# Supplementary material for: Effect of flake size on the mechanical properties of graphene aerogels prepared by freeze casting
Source: Royal Society of Chemistry journal article supplement (doi:10.1039/c7ra05557a), 2017-01-01
Supplement: c7ra05557a1.pdf [file c7ra05557a1.pdf]

## Supplementary Information

### Effect of flake size on the mechanical properties of graphene aerogels prepared by freeze casting

*Weiwei Gao,<sup>\*a</sup> Nifang Zhao,<sup>b</sup> Weiquan Yao,<sup>a</sup> Zhen Xu,<sup>a</sup> Hao Bai,<sup>b</sup> and Chao Gao<sup>a</sup>*

<sup>a</sup>MOE Key Laboratory of Macromolecular Synthesis and Functionalization, Department of Polymer Science and Engineering, Key Laboratory of Adsorption and Separation Materials & Technologies of Zhejiang Province, Zhejiang University, Hangzhou 310027, China

<sup>b</sup>State Key Laboratory of Chemical Engineering, College of Chemical and Biological Engineering, Zhejiang University, Hangzhou 310027, China

\*To whom correspondence should be addressed. E-mail: [wwgao@zju.edu.cn](mailto:wwgao@zju.edu.cn)

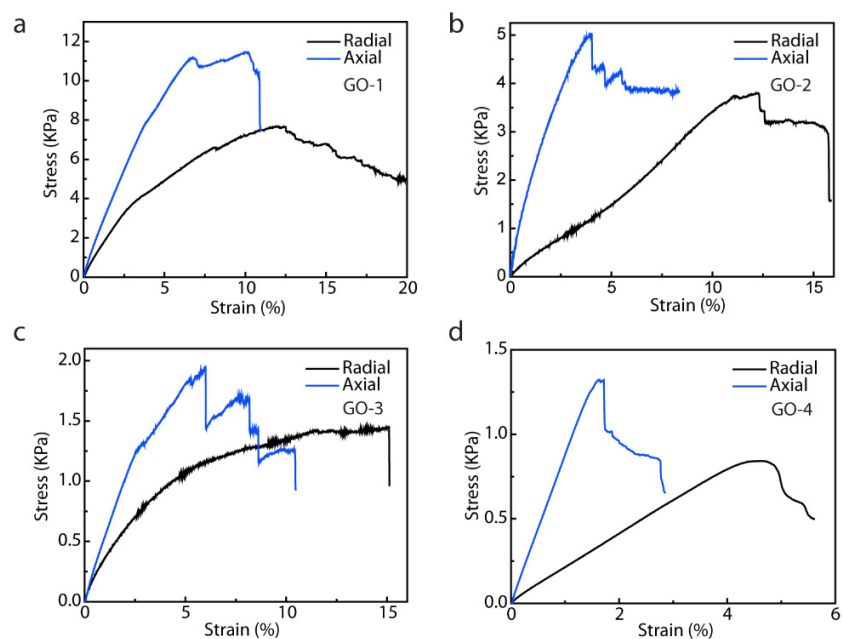

**Fig. S1** Stretch properties of anisotropic graphene aerogels. Tensile stress-strain curves in the radial and axial directions of graphene aerogels assembled with GO-1 (a), GO-2 (b), GO-3 (c) and GO-4 (d) flake size at freezing temperature of  $-90^{\circ}\text{C}$ .
